# Supplementary material for: Usability of a Medication Event Reminder Monitor System (MERM) by Providers and Patients to Improve Adherence in the Management of Tuberculosis
Source: PubMed Central journal article supplement (PMC5664616; doi:10.3390/ijerph14101115), 2017-09-25
Supplement: ijerph-14-01115-s001.pdf [file ijerph-14-01115-s001.pdf]

**Figure S1.** Flow chart for the study population.

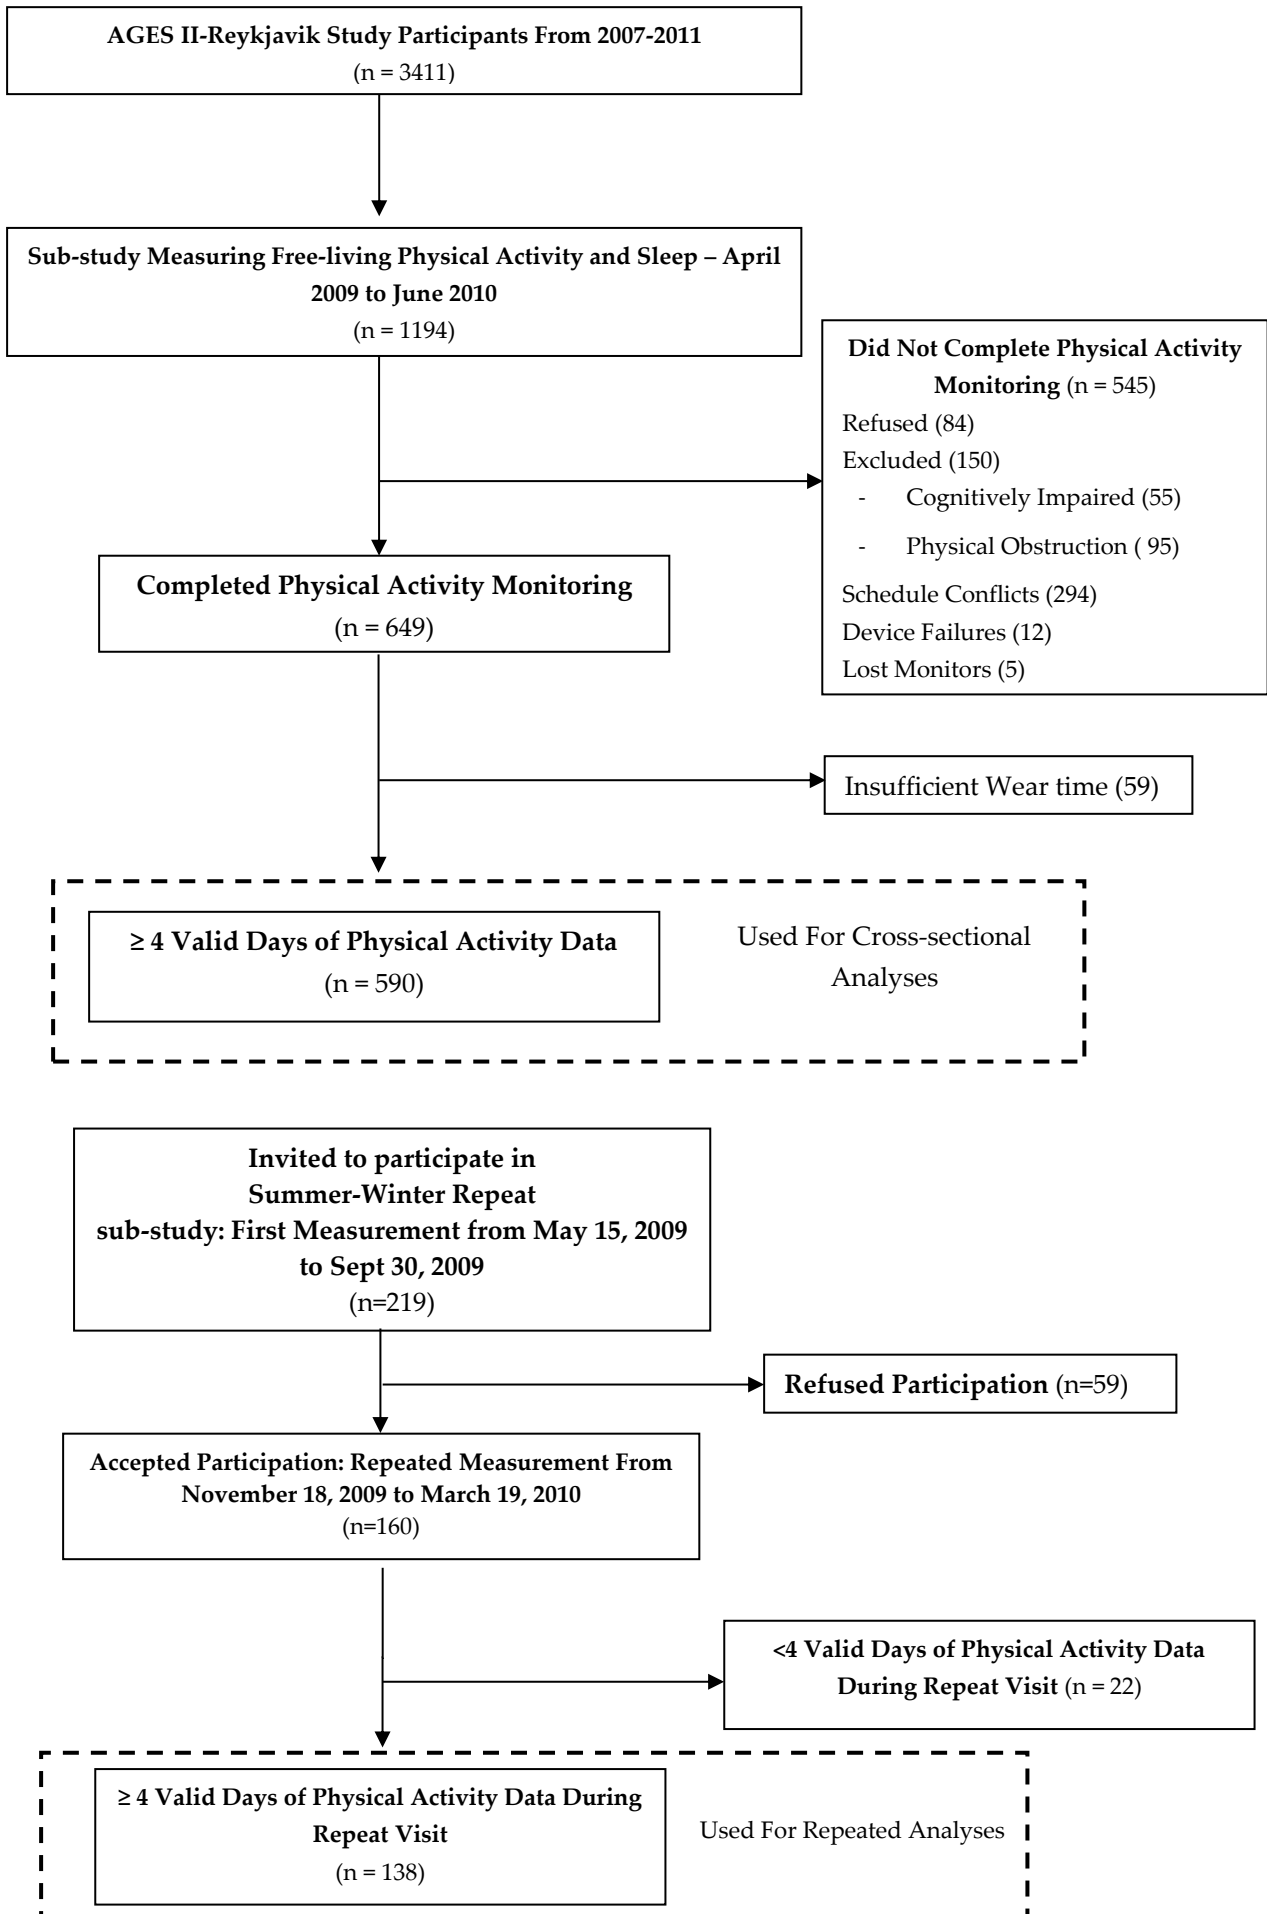

**Table S1:** Results of backward-elimination, linear regression of cross-sectional PA and SB parameters for the AGESII cohort. Covariates included age, sex, BMI, self-reported health status, day length, and temperature. Data are presented as standardized Beta. A negative standardized Beta ( $\beta$ ) value indicates an inverse relationship.

| Variables          |             | Temperature/Day length |                     | Age          |                     | Female       |                      | BMI          |                     | Health status |                      |
|--------------------|-------------|------------------------|---------------------|--------------|---------------------|--------------|----------------------|--------------|---------------------|---------------|----------------------|
|                    |             | $\beta$                | 95% CI              | $\beta$      | 95% CI              | $\beta$      | 95% CI               | $\beta$      | 95% CI              | $\beta$       | 95% CI               |
| WT-SB <sup>a</sup> | Temperature | <b>-0.10</b>           | <b>-0.17; -0.02</b> |              |                     |              |                      |              |                     |               |                      |
|                    | Day length  |                        |                     | <b>0.31</b>  | <b>0.23; 0.38</b>   | <b>-0.15</b> | <b>-0.23; -0.08</b>  | <b>0.11</b>  | <b>0.03; 0.19</b>   | <b>0.10</b>   | <b>0.01; 0.17</b>    |
| TPA <sup>b</sup>   | Temperature | <b>0.10</b>            | <b>0.03; 0.17</b>   | <b>-0.37</b> | <b>-0.45; -0.30</b> | <b>-0.04</b> | <b>-0.11; 0.04</b>   |              |                     |               |                      |
|                    | Day length  |                        |                     |              |                     |              |                      | <b>-0.14</b> | <b>-0.22; -0.06</b> | <b>-0.11</b>  | <b>-0.18; -0.03</b>  |
| LIPA <sup>b</sup>  | Temperature |                        |                     |              |                     |              |                      |              |                     |               |                      |
|                    | Day length  | 0.06                   | -0.02; 0.13         | <b>-0.29</b> | <b>-0.36; -0.21</b> | 0.19         | 0.11; 0.26           | <b>-0.09</b> | <b>-0.17; -0.01</b> | <b>-0.09</b>  | <b>-0.16; -0.002</b> |
| LSPA <sup>b</sup>  | Temperature | <b>0.11</b>            | <b>0.038; 0.19</b>  | <b>-0.36</b> | <b>-0.43; -0.28</b> | <b>-0.08</b> | <b>-0.16; -0.006</b> |              |                     |               |                      |
|                    | Day length  |                        |                     |              |                     |              |                      | <b>-0.11</b> | <b>-0.19; -0.03</b> | <b>-0.12</b>  | <b>-0.19; -0.04</b>  |
| MVPA <sup>b</sup>  | Temperature | 0.05                   | -0.02; 0.13         | <b>-0.29</b> | <b>-0.37; -0.21</b> | <b>-0.21</b> | <b>-0.29; -0.14</b>  |              |                     |               |                      |
|                    | Day length  |                        |                     |              |                     |              |                      | <b>-0.18</b> | <b>-0.25; -0.10</b> | <b>-0.10</b>  | <b>-0.17; -0.02</b>  |

WT= Wear time; SD= standard deviation, day to day variation in each PA/SB variable; PA= Physical activity; SB= Sedentary behavior; TPA= Total PA; LIPA= Low-intensity PA (100-759 counts  $\times$  min<sup>-1</sup>); LSPA= Lifestyle PA ( $\geq$ 760 counts  $\times$  min<sup>-1</sup>); MVPA= Moderate-to-vigorous PA ( $\geq$ 2020 counts  $\times$  min<sup>-1</sup>); <sup>a</sup>= adjusted for wear time; <sup>b</sup>= square root transformed; Significance ( $p < 0.05$ ) are shown in bold.
